# Supplementary material for: Counter ion-regulated heterostructured Co@Fe-based core@shell materials: as remarkable bifunctional electrodes for green H2 production
Source: Royal Society of Chemistry journal article supplement (doi:10.1039/d4ta02785j), 2024-01-01
Supplement: d4ta02785j1.pdf [file d4ta02785j1.pdf]

Electronic supplementary information

## **Counter Ion-Regulated Heterostructured Co@Fe-Based Core@Shell Materials: As Remarkable Bifunctional Electrodes for Green H<sub>2</sub> Production**

Gaddam Rajeshkhanna,<sup>\*a</sup> Apurba Borah,<sup>a</sup> Thangjam Ibomcha Singh,<sup>b</sup> Thanh Hai Nguyen,<sup>c</sup>

Van An Dinh,<sup>d</sup> Nam Hoon Kim,<sup>c\*</sup> Joong Hee Lee<sup>\*ce</sup>

<sup>a</sup>*Department of Chemistry, National Institute of Technology Warangal, Warangal 506004 Telangana, India, E-mail: grkhanna@nitw.ac.in*

<sup>b</sup>*Department of Physics, Manipur University, Canchipur, Manipur, 795003, India*

<sup>c</sup>*Department of Nano Convergence Engineering, Jeonbuk National University, Jeonju, Jeonbuk, 54896, Republic of Korea. E-mail: nhk@jbnu.ac.kr; jhl@jbnu.ac.kr*

<sup>d</sup>*Department of Precision Engineering, Graduate School of Engineering, Osaka University, 2-1, Yamada-oka, Suita, Osaka 565-0871, Japan*

<sup>e</sup>*Center for Carbon Composite Materials, Department of Polymer-Nano Science and Technology, Jeonbuk National University, Jeonju, Jeonbuk, 54896, Republic of Korea*

### **1. Experimental section**

#### **1.1. Synthesis of core-shell type Co(OH)<sub>2</sub>@FeOOH/NF, Co<sub>3</sub>O<sub>4</sub>@Fe<sub>3</sub>O<sub>4</sub>/NF, and Co<sub>2</sub>P@Fe<sub>2</sub>P/NF**

A core-shell structure of Co(OH)<sub>2</sub>@FeOOH on Ni-foam (NF) was successfully synthesized through a two-step hydrothermal route. In the initial step, Co(OH)<sub>2</sub>/NF was prepared using a straightforward hydrothermal method. Specifically, 1 mmol of Co(NO<sub>3</sub>)<sub>2</sub>·6H<sub>2</sub>O (99.99%, Sigma-Aldrich), 2 mmol of NH<sub>4</sub>F (99.99%, Sigma-Aldrich), and 2 mmol of CO(NH<sub>2</sub>)<sub>2</sub> (>99.5%, Sigma-Aldrich) were dissolved in 50 mL of deionized water (DI) with vigorous stirring at room temperature for 30 minutes. The resulting solution was transferred into a 70 mL Teflon-lined stainless-steel autoclave. A piece of Ni-foam (2 × 4 cm<sup>2</sup>) was pre-treated by cleaning in 3 M HCl to eliminate the surface oxide layer, followed by ultrasonic cleaning in DI water for 15 minutes on several times. Subsequently, the pre-cleaned Ni-foam was immersed in the solution, supported against the Teflon cup, sealed, and heated at 120 °C for 8 hours. The resulting Co(OH)<sub>2</sub>/NF precursor was rinsed with DI water and ethanol, then dried overnight at 60 °C. In the second hydrothermal step, a solution containing 0.5 mmol of Fe(NO<sub>3</sub>)<sub>3</sub>·9H<sub>2</sub>O, 1

mmol of  $\text{NH}_4\text{F}$ , and 1 mmol of  $\text{CO}(\text{NH}_2)_2$  in 50 mL of DI water was stirred for approximately 10 minutes for homogeneity. This solution was added to a 70 mL Teflon cup. The previously prepared  $\text{Co}(\text{OH})_2/\text{NF}$  was introduced into this solution, and the sealed system was heated at 120 °C for 8 hours. The resulting sample ( $\text{Co}(\text{OH})_2@\text{FeOOH}/\text{NF}$ ) was washed with DI water and ethanol, then dried at 60 °C overnight. The  $\text{Co}_3\text{O}_4@\text{Fe}_3\text{O}_4/\text{NF}$  sample was obtained by subjecting the  $\text{Co}(\text{OH})_2@\text{FeOOH}/\text{NF}$  sample to oxidation through heat treatment in a tubular furnace at 300 °C under an air atmosphere for 2 hours. To produce the  $\text{Co}_2\text{P}@\text{Fe}_2\text{P}/\text{NF}$  sample, the  $\text{Co}(\text{OH})_2@\text{FeOOH}/\text{NF}$  sample and sodium hypophosphite ( $\text{Na}_2\text{H}_2\text{PO}_4 \cdot 2\text{H}_2\text{O}$ ) were placed in a tubular furnace, with  $\text{Na}_2\text{H}_2\text{PO}_4 \cdot 2\text{H}_2\text{O}$  positioned upstream of the furnace, and heated at 350 °C under an argon atmosphere for 3 hours. For comparison,  $\text{Co}(\text{OH})_2$  and  $\text{FeOOH}$  materials were separately synthesized using the same concentrations and hydrothermal conditions.

## **1.2. Characterization**

The synthesized materials were subjected to comprehensive characterization to assess their structure and phase. Powder X-ray diffraction (PXRD) was performed using a Rigaku Corporation instrument in Japan, employing  $\text{CuK}\alpha$  radiation with a wavelength ( $\lambda$ ) of 0.154 nm. This technique provided insights into the structure and phase of the materials. For a detailed examination of surface morphological features and elemental distribution, field-emission scanning electron microscopy (FE-SEM) was employed, utilizing a JSM-6701F instrument from JEOL in Japan. Additionally, the core-shell structure, crystallinity, and elemental composition were scrutinized using high-resolution transmission electron microscopy (HR-TEM), scanning transmission electron microscopy (STEM), and energy-dispersive X-ray spectroscopy (EDX) on a JEM-2200 FS instrument by JEOL Ltd. operating at 200 kV. To further analyze the surface elemental compositions and valence states, X-ray photoelectron spectroscopy (XPS) was conducted using a Theta Probe instrument from Thermo

Fisher Scientific in the UK. This technique provided valuable information about the chemical states of elements on the material's surface. In summary, the combination of these advanced characterization techniques enabled a comprehensive understanding of the structural, morphological, and compositional aspects of the synthesized materials.

### 1.3. Fabrication of electrodes and electrochemical measurements

The electrochemical performances of the in situ grown materials on Ni foam were assessed using a CHI 660E electrochemical workstation. In the standard three-electrode evaluation setup, binder-free  $\text{Co}(\text{OH})_2@\text{FeOOH}/\text{NF}$ ,  $\text{Co}_3\text{O}_4@\text{Fe}_3\text{O}_4/\text{NF}$ , and  $\text{Co}_2\text{P}@\text{Fe}_2\text{P}/\text{NF}$  served as the working electrode (with a  $1 \text{ cm}^2$  area), an Hg/HgO electrode functioned as the reference electrode, and a graphite rod acted as the counter electrode. As a point of reference, the as-synthesized  $\text{Co}(\text{OH})_2/\text{NF}$  (core) and  $\text{FeOOH}/\text{NF}$  (shell) were directly employed as working electrodes. For the fabrication of the alkaline electrolysis cell, the working electrodes were utilized as both the anode and cathode. The electrocatalytic activities of synthesized electrode materials were compared with the state-of-the-art catalysts, commercial Pt/C (20 wt.%) and  $\text{RuO}_2$  (99.9 wt.%) catalyst inks were prepared separately by dispersing 5 mg of each sample in a solution mixture comprising 750  $\mu\text{L}$  of isopropyl alcohol, 200  $\mu\text{L}$  of deionized (DI) water, and 50  $\mu\text{L}$  of 5% Nafion. This mixture underwent ultrasonication treatment for about 45 minutes and was then coated onto a  $1 \text{ cm}^2$  area of Ni foam.

In three electrode tests, all potentials were referenced to reversible hydrogen electrode (RHE) potentials, derived from Hg/HgO electrode potentials using the Nernst equation:  $E_{\text{RHE}} = E_{\text{Ag/AgCl}} + 0.059 \times \text{pH} + 0.098 \text{ V}$ . To ensure the accuracy, all RHE potentials were  $iR$ -corrected using the equation:  $E_{\text{corr}} = E_{\text{mea}} - iR$ , where  $E_{\text{corr}}$  is the  $iR$ -corrected potential,  $E_{\text{mea}}$  is the experimentally measured potential,  $i$  is the current and  $R$  is the uncompensated ohmic electrolyte resistance measured by electrochemical impedance spectroscopy (EIS) at high frequency. The overpotential ( $\eta$ ) values were evaluated from an equation of

$\eta = E_{RHE} - 1.23 V$ . The Tafel slopes were obtained from LSV curves using the following equation  $\eta = b \log(j) + a$ , where  $\eta$  is overpotential,  $b$  is Tafel slope,  $j$  is current density.

#### 1.4. Density functional theory calculation methods

All the spin-polarized density functional theory (DFT) calculations were performed using Vienna Ab Initio Package (VASP).<sup>1-2</sup> The exchange-correlation interaction was described using generalized gradient approximation (GGA) parameterized by the Perdew-Burke-Enzerhof.<sup>3</sup> A cut-off energy of 500 eV was used together with the projected augmented wave (PAW) potentials.<sup>4</sup> Grimme D3 correction was used to satisfy the dispersion interactions.<sup>5</sup> A vacuum spacing of 15 Å was added into the z-direction to avoid the interaction between repeated slabs. A  $\Gamma$ -centered k-point of  $3 \times 3 \times 1$  was used in this study. A geometry optimization was allowed to relax until the residual force change was less than 0.03 eV Å<sup>-1</sup>.

The Gibbs free energy was calculated as follows:

$$\Delta G = \Delta E_{ads} + \Delta E_{ZPE} - T \Delta S$$

where  $\Delta E_{ads}$  is the adsorption energy of intermediates.  $\Delta E_{ZPE}$  and  $\Delta S$  are changes in zero-point energy and entropy between adsorbed intermediates and molecule in gas phase, respectively. T is temperature (K).

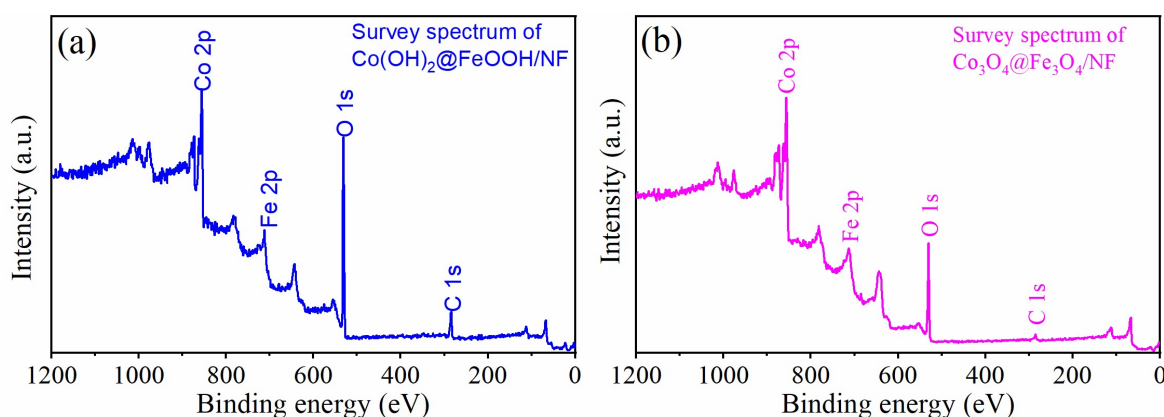

**Fig. S1** XPS survey spectrum of (a)  $\text{Co}(\text{OH})_2@ \text{FeOOH}/\text{NF}$ , and (b)  $\text{Co}_3\text{O}_4@ \text{Fe}_3\text{O}_4/\text{NF}$ .

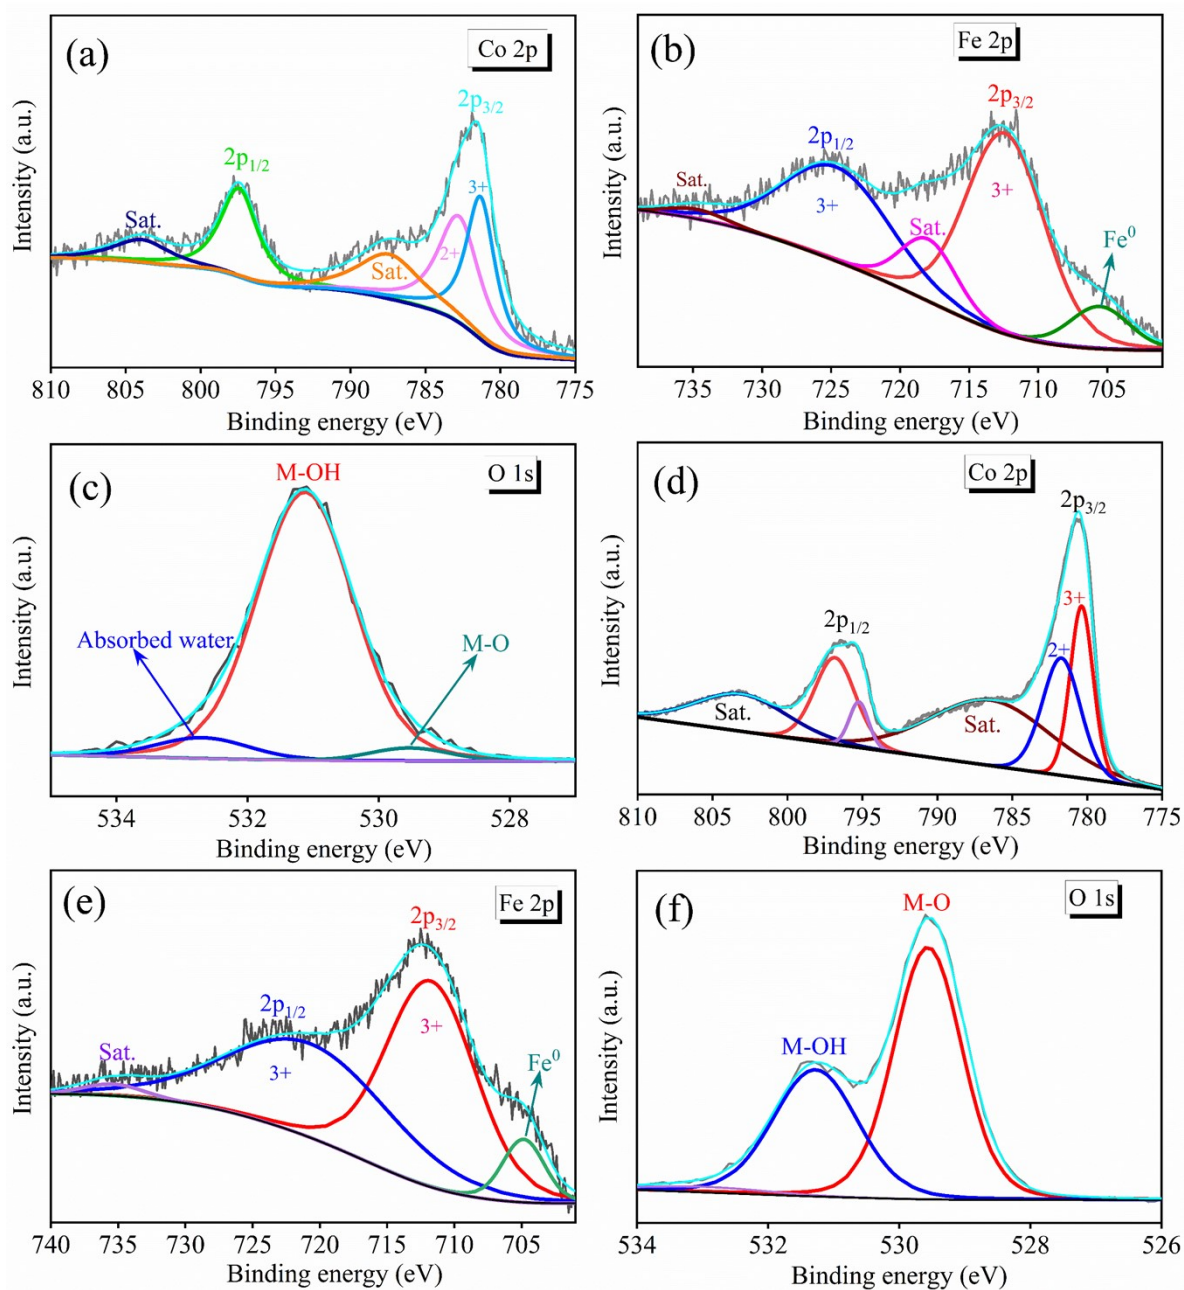

**Fig. S2** XPS deconvoluted spectra for (a) Co 2p, (b) Fe 2P, (c) O 1s of Co(OH)<sub>2</sub>@FeOOH/NF, and (d) Co 2p, (e) Fe 2p, (f) O 1s of Co<sub>3</sub>O<sub>4</sub>@Fe<sub>3</sub>O<sub>4</sub>/NF.

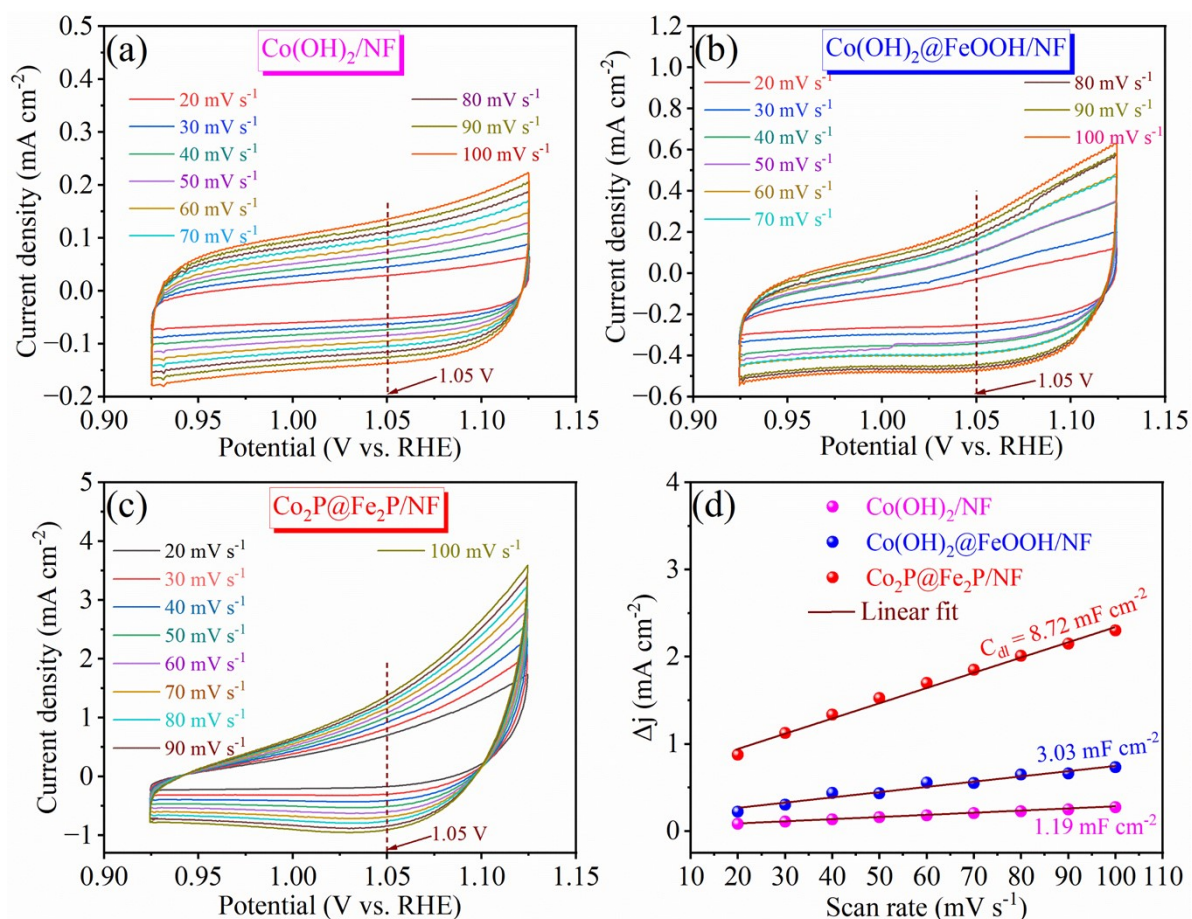

**Fig. S3** Cyclic voltammograms at different scan rates of (a)  $\text{Co(OH)}_2/\text{NF}$ , (b)  $\text{Co(OH)}_2@\text{FeOOH}/\text{NF}$ , (c)  $\text{Co}_2\text{P}@\text{Fe}_2\text{P}/\text{NF}$ , and (d) scan rate vs. difference in anodic and cathodic current densities ( $\Delta j$ ) plot at 1.05 V with  $C_{dl}$  values.

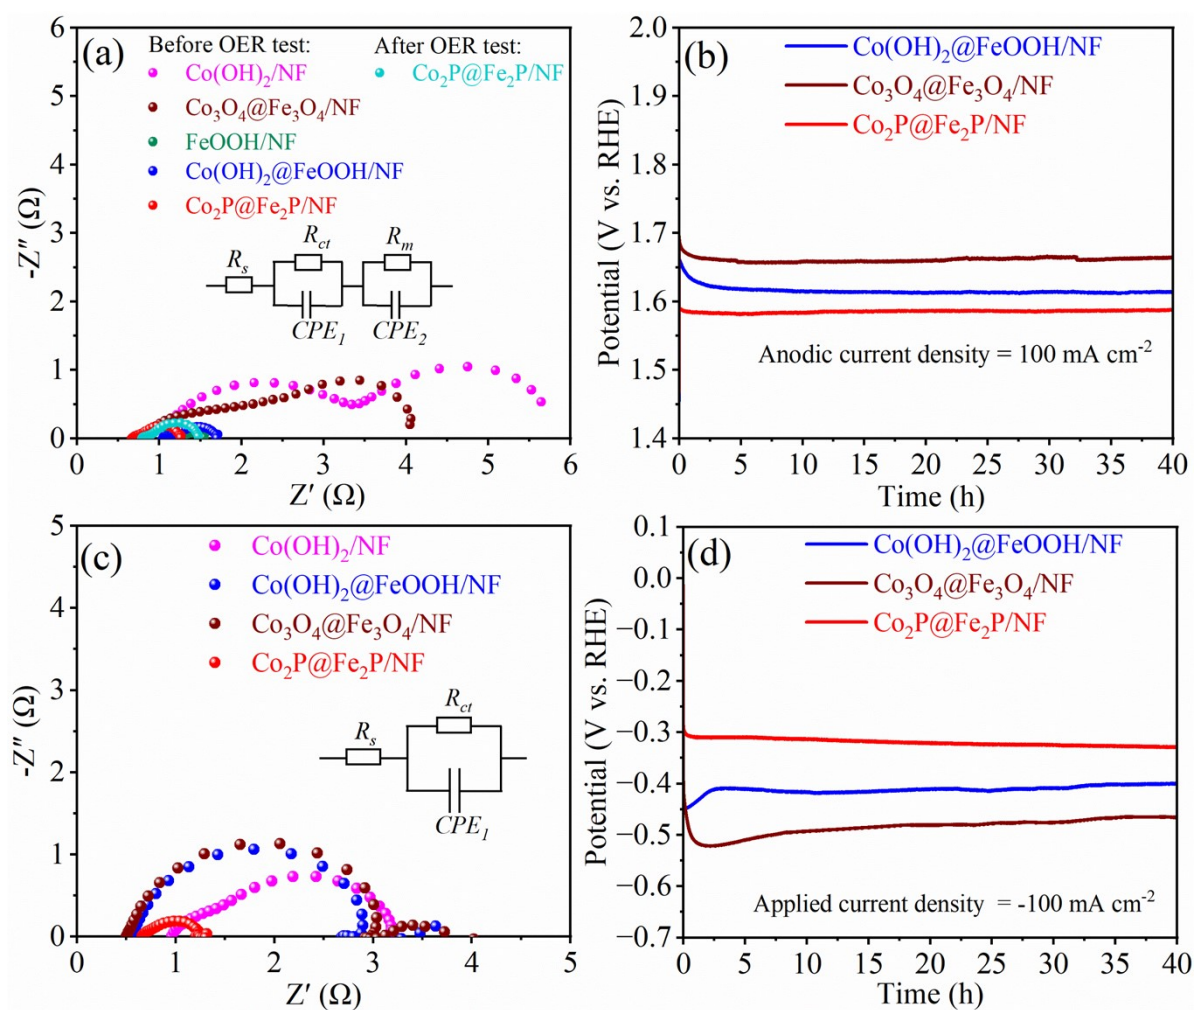

**Fig. S4** (a) Nyquist plots in OER region at 1.53 V, (b) chronopotentiometric stability tests for OER at 100 mA cm<sup>-2</sup> current density, (c) Nyquist plots before HER test at -0.275 V, and (d) chronopotentiometric stability tests for HER at -100 mA cm<sup>-2</sup> current density.



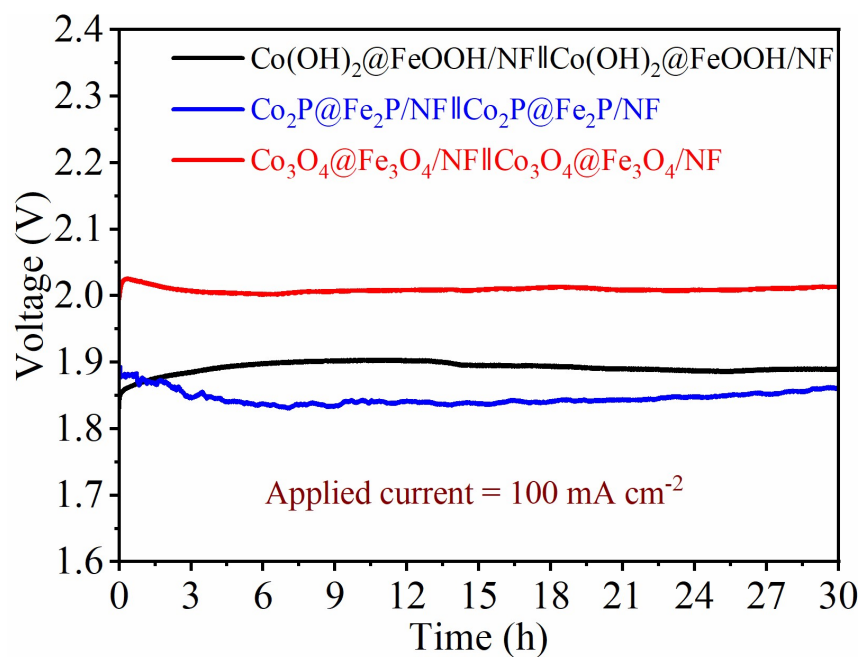

**Fig. S5** Chronopotentiometric stability test of fabricated electrolyzers at 100 mA cm<sup>-2</sup>.

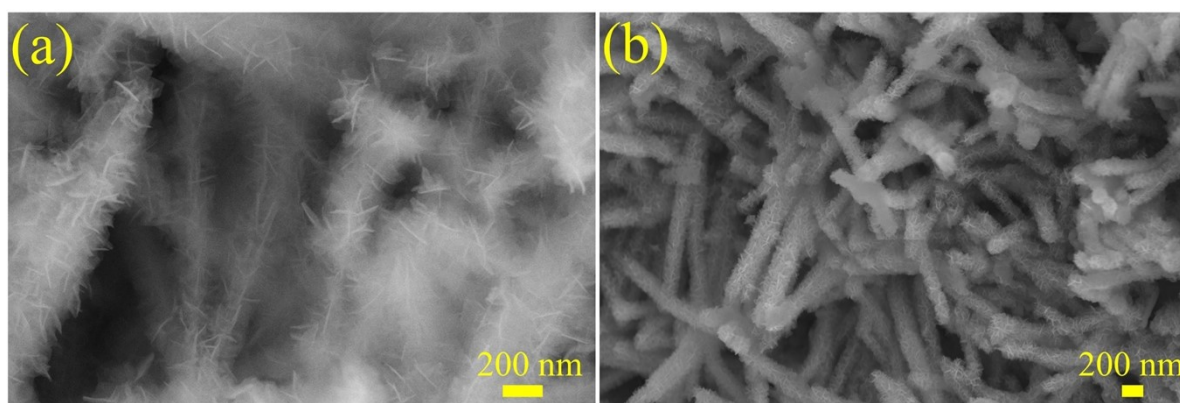

**Fig. S6** Potst-OER FESEM images of (a) Co(OH)<sub>2</sub>@FeOOH, and (b) Co<sub>2</sub>P@Fe<sub>2</sub>P.



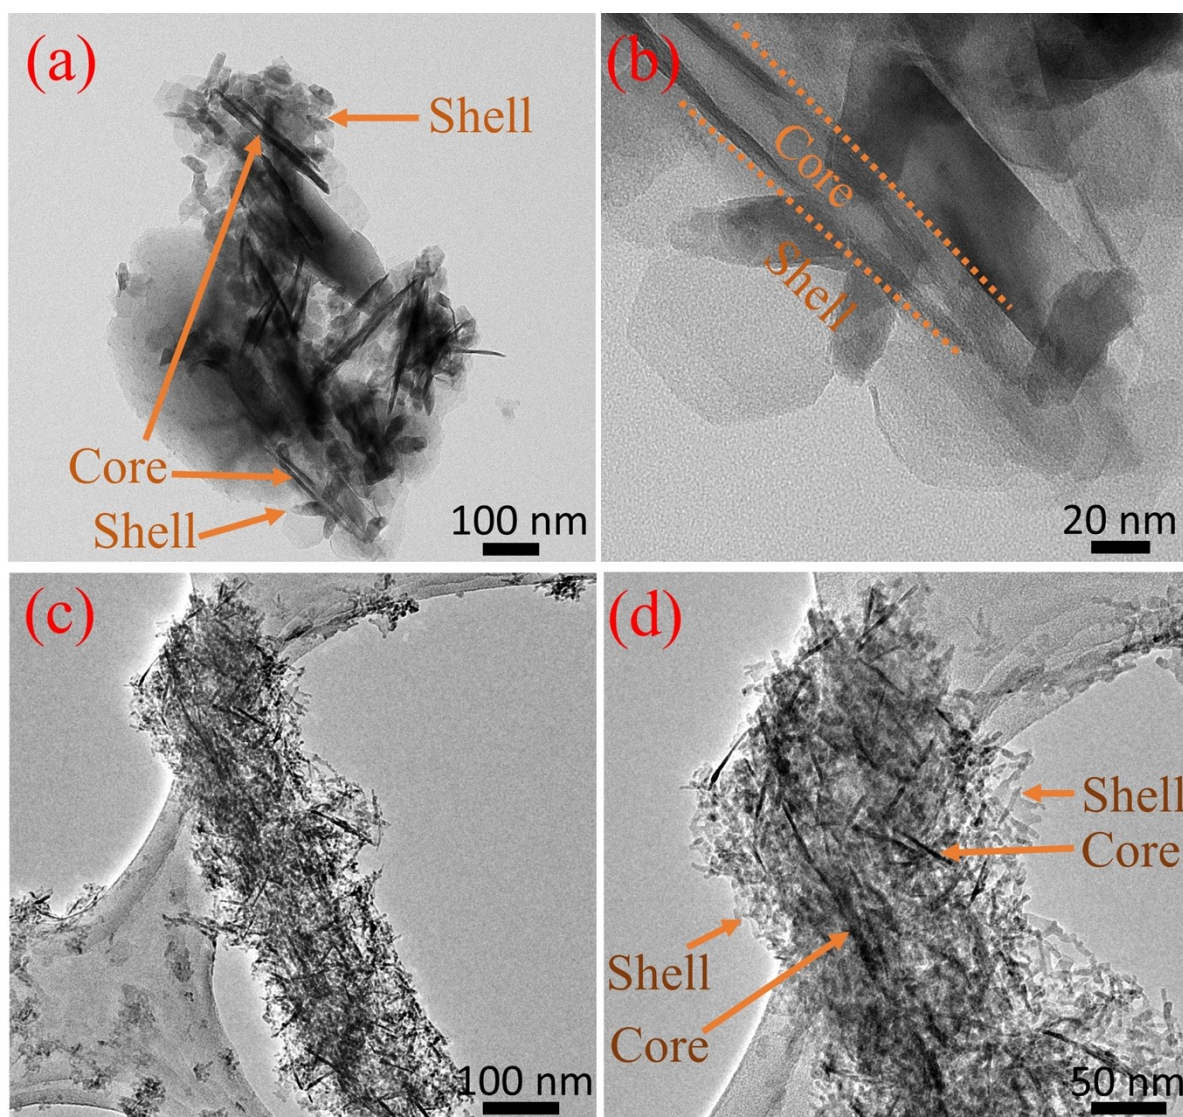

**Fig. S7** Post-OER TEM images of (a,b)  $\text{Co(OH)}_2@ \text{FeOOH}$ , (c,d)  $\text{Co}_2\text{P}@ \text{Fe}_2\text{P}$ .

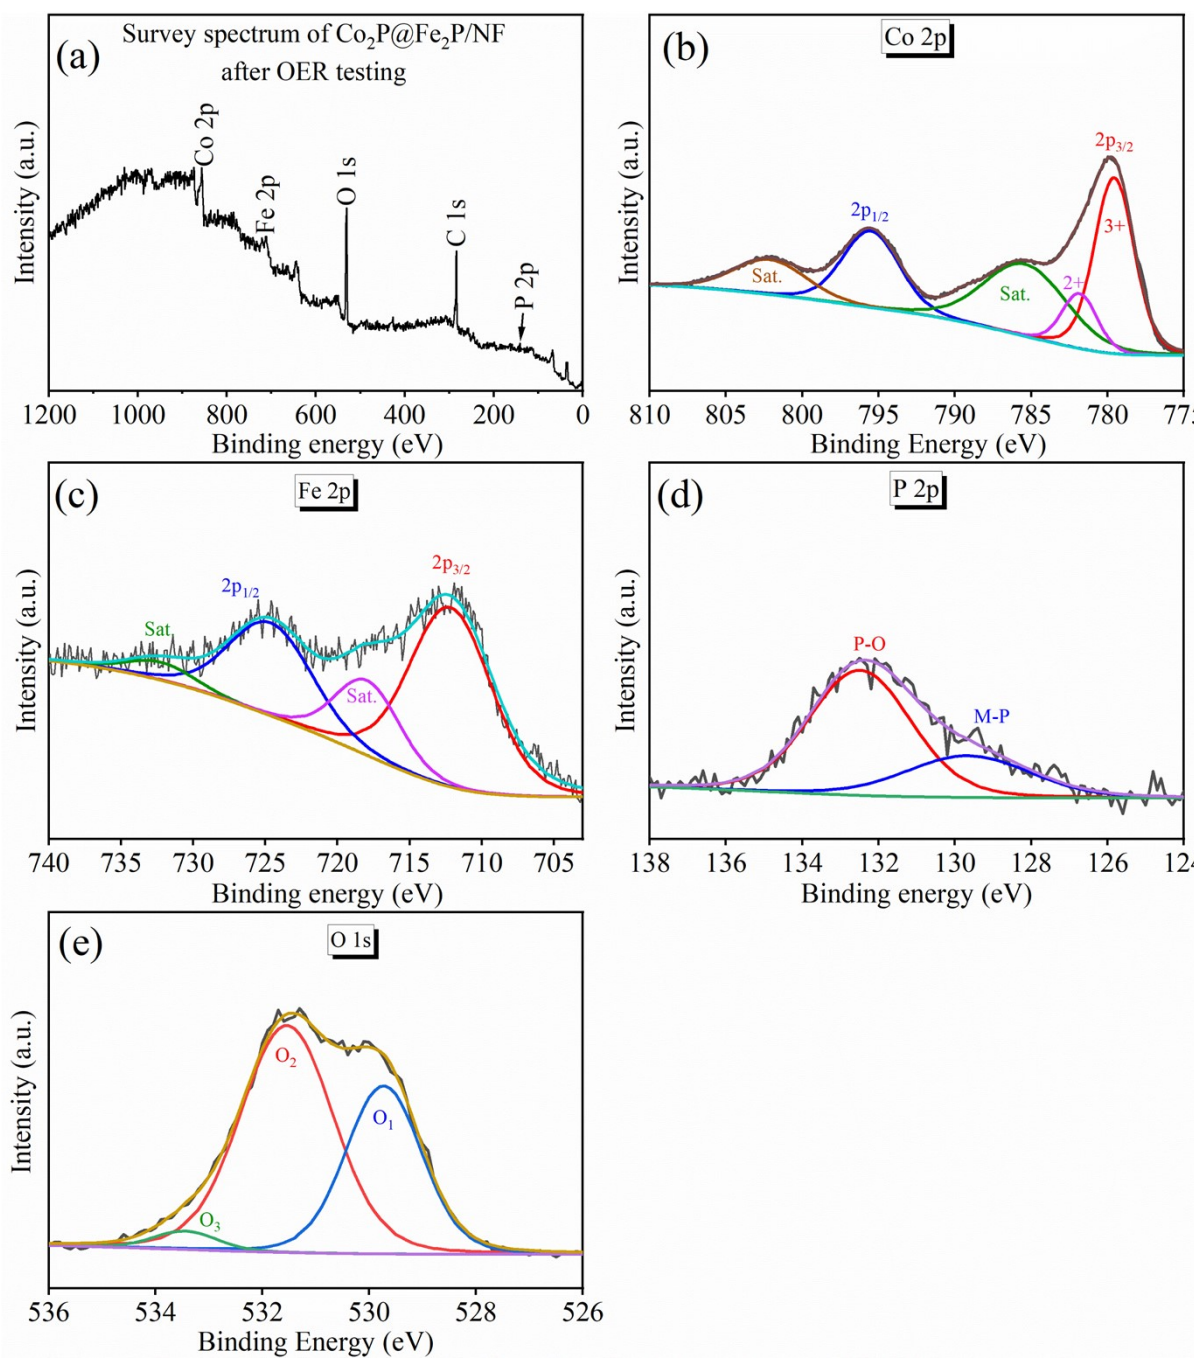

**Fig. S8** XPS (a) survey spectrum, deconvoluted spectra for (b) Co 2p, (c) Fe 2p, (d) P 2p, and (e) O 1s of  $\text{Co}_2\text{P@Fe}_2\text{P/NF}$  after OER testing.

**Table S1.** Comparison of OER performance of the synthesized electrode materials with the results of recently reported non-noble transition metal-based electrocatalysts.

| Sl. No. | Electrode material                                                               | Electrolyte                          | $\eta_{10}^a)$<br>(mV) | $\eta_{50}^b)$<br>(mV) | Tafel slope (mV dec <sup>-1</sup> ) | Reference |
|---------|----------------------------------------------------------------------------------|--------------------------------------|------------------------|------------------------|-------------------------------------|-----------|
| 1       | Co(OH) <sub>2</sub> @FeOOH/NF                                                    | 1 M KOH                              | -                      | 237                    | 34 <sup>c)</sup>                    | This work |
| 2       | Co <sub>3</sub> O <sub>4</sub> @Fe <sub>3</sub> O <sub>4</sub> /NF               | 1 M KOH                              | -                      | 378                    | 70 <sup>c)</sup>                    | This work |
| 3       | Co <sub>2</sub> P@Fe <sub>2</sub> P/NF                                           | 1 M KOH                              | -                      | 267                    | 65 <sup>c)</sup>                    | This work |
| 4       | Zn <sub>1-x</sub> Fe <sub>x</sub> -LDH/Ni-foam                                   | 1 M KOH                              | -                      | 288                    | 58                                  | S6        |
| 5       | Zn <sub>1-x</sub> Fe <sub>x</sub> -oxyselenide/Ni-foam                           | 1 M KOH                              | -                      | 277                    | 54                                  | S7        |
| 6       | Co <sub>0.025</sub> -NiFe-LDH/NF                                                 | 1 M KOH                              | 208                    | -                      | 50.9                                | S8        |
| 7       | Co(OH)F@CoFe-LDH                                                                 | 1 M KOH                              | 240                    | -                      | 25.4                                | S8        |
| 8       | Co <sub>3</sub> Fe <sub>7</sub> @NCNTFs                                          | 1 M KOH                              | 264                    | -                      | 79                                  | S9        |
| 9       | CoFeSP/CNT                                                                       | 1 M KOH                              | 262                    | -                      | 54                                  | S10       |
| 10      | CoMoRuO <sub>x</sub> -350                                                        | 1 M KOH                              | 250                    | -                      | 83.8                                | S11       |
| 11      | Mo-CoP (1/2.3)                                                                   | 1 M KOH                              | 317                    | -                      | 82                                  | S12       |
| 12      | Co <sub>3</sub> S <sub>4</sub> @MoS <sub>2</sub> -Ni <sub>3</sub> S <sub>2</sub> | 1 M KOH                              | -                      | 270                    | 69                                  | S13       |
| 13      | Co <sub>3</sub> S <sub>4</sub> @rGO                                              | 0.5 M H <sub>2</sub> SO <sub>4</sub> | 350                    | -                      | 65                                  | S14       |
| 14      | Co <sub>3</sub> O <sub>4</sub> @rGO                                              | 0.5 M H <sub>2</sub> SO <sub>4</sub> | 380                    | -                      | 121                                 | S14       |
| 15      | FeCoNiP@NC                                                                       | 1 M KOH                              | 266                    | -                      | 35.6                                | S15       |
| 16      | Co-Fe oxyphosphide                                                               | 1 M KOH                              | 280                    | -                      | 53                                  | S16       |
| 17      | Co@BNPCFs-800                                                                    | 1 M KOH                              | 324                    | -                      | 55.6                                | S17       |
| 18      | Co/Mo <sub>2</sub> C@C                                                           | 1 M KOH                              | 254                    | -                      | 136                                 | S18       |
| 19      | Ni-Fe-S/Cu                                                                       | 1 M KOH                              | 375.3                  | 450                    | 79.5                                | S19       |
| 20      | Co@NC nanocage/HCF <sub>200</sub>                                                | O <sub>2</sub> sat. 1 M KOH          | 396                    | -                      | 90.22                               | S20       |

a)  $\eta_{10}$  is overpotential at a current density of 10 mA cm<sup>-2</sup>; b)  $\eta_{50}$  is overpotential at a current density of 50 mA cm<sup>-2</sup>; c) Tafel slope at low overpotential region.

**Table S2.** Comparison of HER performance of the synthesized electrode materials with recently reported non-noble transition metal-based results.

| Sl. No. | Electrode material                                                               | Electrolyte                          | $\eta_{-10}^{a)}$ (mV) | $\eta_{-50}^{b)}$ (mV) | Tafel slope (mV dec <sup>-1</sup> ) | Reference |
|---------|----------------------------------------------------------------------------------|--------------------------------------|------------------------|------------------------|-------------------------------------|-----------|
| 1       | Co(OH) <sub>2</sub> @FeOOH/NF                                                    | 1 M KOH                              | 175                    | 275                    | 140                                 | This work |
| 2       | Co <sub>3</sub> O <sub>4</sub> @Fe <sub>3</sub> O <sub>4</sub> /NF               | 1 M KOH                              | 255                    | 352                    | 135                                 | This work |
| 3       | Co <sub>2</sub> P@Fe <sub>2</sub> P/NF                                           | 1 M KOH                              | 95                     | 196                    | 120                                 | This work |
| 4       | Zn <sub>1-x</sub> Fe <sub>x</sub> -LDH/Ni-foam                                   | 1 M KOH                              | 221                    | 327                    | 150                                 | S6        |
| 5       | Zn <sub>1-x</sub> Fe <sub>x</sub> -oxyselenide/Ni-foam                           | 1 M KOH                              | 238                    | 347                    | 153                                 | S6        |
| 6       | Co <sub>0.025</sub> -NiFe-LDH/NF                                                 | 1 M KOH                              | 113                    | -                      | 114.5                               | S7        |
| 7       | Co(OH)F@CoFe-LDH                                                                 | 1 M KOH                              | 130                    | -                      | 82.9                                | S8        |
| 8       | Co <sub>3</sub> Fe <sub>7</sub> @NCNTFs                                          | 1 M KOH                              | 197                    | -                      | 62                                  | S9        |
| 9       | CoFeSP/CNT                                                                       | 1 M KOH                              | 130                    | -                      | 70                                  | S10       |
| 10      | Mo-CoP (1/2.3)                                                                   | 1 M KOH                              | 118                    | -                      | 76                                  | S12       |
| 11      | Mo-CoP (1/2.3)                                                                   | 0.5 M H <sub>2</sub> SO <sub>4</sub> | 116                    | -                      | 69                                  | S12       |
| 12      | Co <sub>3</sub> S <sub>4</sub> @MoS <sub>2</sub> -Ni <sub>3</sub> S <sub>2</sub> | 1 M KOH                              | 136                    | -                      | 72                                  | S13       |
| 13      | Co <sub>3</sub> S <sub>4</sub> @rGO                                              | 0.5 M H <sub>2</sub> SO <sub>4</sub> | 151                    | -                      | 59                                  | S14       |
| 14      | Co <sub>3</sub> O <sub>4</sub> @rGO                                              | 0.5 M H <sub>2</sub> SO <sub>4</sub> | 234                    | -                      | 153                                 | S14       |
| 15      | FeCoNiP@NC                                                                       | 1 M KOH                              | 187                    | -                      | 51.7                                | S15       |
| 16      | Co-Fe oxyphosphide                                                               | 1 M KOH                              | 180                    | -                      | 62                                  | S16       |
| 17      | Co@BNPCFs-800                                                                    | 1 M KOH                              | 151.3                  | -                      | 91.78                               | S17       |
| 18      | Co/Mo <sub>2</sub> C@C                                                           | 1 M KOH                              | 98                     | -                      | 68                                  | S18       |
| 19      | Co@NC nanocage/HCF <sub>200</sub>                                                | N <sub>2</sub> sat. 1 M KOH          | 261.4                  | -                      | 109.88                              | S20       |
| 20      | Fe-Ni <sub>5</sub> P <sub>4</sub> /NiFeOH-350                                    | 1 M KOH                              | 197                    | -                      | 94                                  | S21       |
| 21      | MoS <sub>2</sub> /NiFe LDH                                                       | 1 M KOH                              | 98                     | -                      | 95                                  | S22       |

<sup>a)</sup>  $\eta - 10$  is overpotential at a current density of  $-10 \text{ mA cm}^{-2}$ ; <sup>b)</sup>  $\eta - 50$  is overpotential at a current density of  $-50 \text{ mA cm}^{-2}$ .

**Table S3.** Comparison of cell potential for overall water splitting performance of the synthesized electrode materials with recently reported non-noble transition metal-based results.

| Sl. No. | Electrolyzer                                                                                                            | Electrolyte                   | $E_{cell}^a$ (V) @ $10 \text{ mA cm}^{-2}$ | References |
|---------|-------------------------------------------------------------------------------------------------------------------------|-------------------------------|--------------------------------------------|------------|
| 1       | $\text{Co(OH)}_2@\text{FeOOH/NF} \parallel \text{Co(OH)}_2@\text{FeOOH/NF}$                                             | 1 M KOH                       | 1.58                                       | This work  |
| 2       | $\text{Co}_3\text{O}_4@\text{Fe}_3\text{O}_4/\text{NF} \parallel \text{Co}_3\text{O}_4@\text{Fe}_3\text{O}_4/\text{NF}$ | 1 M KOH                       | 1.7                                        | This work  |
| 3       | $\text{Co}_2\text{P}@\text{Fe}_2\text{P/NF} \parallel \text{Co}_2\text{P}@\text{Fe}_2\text{P/NF}$                       | 1 M KOH                       | 1.53                                       | This work  |
| 4       | $\text{FeOOH/NF} \parallel \text{FeOOH/NF}$                                                                             | 1 M KOH                       | 1.65                                       | This work  |
| 5       | $\text{Co}_{0.025}\text{-NiFe-LDH/NF} \parallel \text{Co}_{0.025}\text{-NiFe-LDH/NF}$                                   | 1 M KOH                       | 1.58                                       | S7         |
| 6       | $\text{Co(OH)F}@\text{CoFe-LDH} \parallel \text{Co(OH)F}@\text{CoFe-LDH}$                                               | 1 M KOH                       | 1.58                                       | S8         |
| 7       | $\text{Co}_3\text{Fe}_7@\text{NCNTFs} \parallel \text{Co}_3\text{Fe}_7@\text{NCNTFs}$                                   | 1 M KOH                       | 1.64                                       | S9         |
| 8       | $\text{CoFeSP/CNT} \parallel \text{CoFeSP/CNT}$                                                                         | 1 M KOH                       | 1.632                                      | S10        |
| 9       | $\text{CoMoRuO}_x\text{-350} \parallel \text{Pt/C}$                                                                     | 1 M KOH                       | 1.55                                       | S11        |
| 10      | $\text{Mo-CoP (1/2.3)} \parallel \text{Mo-CoP (1/2.3)}$                                                                 | 1 M KOH                       | 1.7                                        | S12        |
| 11      | $\text{Co}_3\text{S}_4@\text{rGO} \parallel \text{Co}_3\text{S}_4@\text{rGO}$                                           | 0.5 M $\text{H}_2\text{SO}_4$ | 1.82                                       | S14        |
| 12      | $\text{FeCoNiP}@\text{NC} \parallel \text{FeCoNiP}@\text{NC}$                                                           | 1 M KOH                       | 1.73                                       | S15        |
| 13      | $\text{Co}@\text{BNPCFs-800} \parallel \text{Co}@\text{BNPCFs-800}$                                                     | 1 M KOH                       | 1.596                                      | S17        |

|    |                                                                                                |         |       |     |
|----|------------------------------------------------------------------------------------------------|---------|-------|-----|
| 14 | Co/Mo <sub>2</sub> C@C    Co/Mo <sub>2</sub> C@C                                               | 1 M KOH | 1.59  | S18 |
| 15 | Ni-Fe-S/Cu    Ni-Fe-S/Cu                                                                       | 1 M KOH | 1.705 | S19 |
| 16 | Co@NC nanocage/HCF <sub>200</sub>    Co@NC nanocage/HCF <sub>200</sub>                         | 1 M KOH | 1.618 | S20 |
| 17 | Fe-Ni <sub>5</sub> P <sub>4</sub> /NiFeOH-350    Fe-Ni <sub>5</sub> P <sub>4</sub> /NiFeOH-350 | 1 M KOH | 1.55  | S21 |
| 18 | MoS <sub>2</sub> /NiFe LDH    MoS <sub>2</sub> /NiFe LDH                                       | 1 M KOH | 1.61  | S22 |
| 19 | Co <sub>3</sub> S <sub>4</sub> @NiCo-LDH    Co <sub>3</sub> S <sub>4</sub> @NiCo-LDH           | 1 M KOH | 1.59  | S23 |

---

<sup>a)</sup> $E_{cell}$  is cell potential.

## References

- S1 G. Kresse and J. Furthmuller, *Comput. Mater. Sci.*, 1996, **6**, 15.
- S2 G. Kresse and J. Furthmuller, *Phys. Rev. B*, 1996, **54**, 11169.
- S3 J. P. Perdew, K. Burke and M. Ernzerhof, *Phys. Rev. Lett.*, 1996, **77**, 3865.
- S4 G. Kresse and D. Joubert, *Phys. Rev. B*, 1999, **59**, 1758.
- S5 S. Grimme, J. Antony, S. Ehrlich, H. Krieg, *J. Chem. Phys.*, 2010, **132**, 154104.
- S6 G. Rajeshkhanna, S. Kandula, K. R. Shrestha, N. H. Kim and J. H. Lee, *Small*, 2018, **14**, 1803638.
- S7 Y. Liu, S. He, Y. Chen, Z. Zou and Q. Wang, *J. of Power Sources*, 2021, **506**, 230097.
- S8 M. Qin, Y. Wang, H. Zhang, M. Humayun, X. Xu, Y. Fu, M. K. Kadirov and C. Wang, *CrystEngComm*, 2022, **24**, 6018-6030.
- S9 Q. Yuan, Y. Yu, P. C. Sherrell, J. Chen and X. Bi, *Chem. Asian J.*, 2020, **15**, 1728-1735.
- S10 L. Huang, H. Wu, H. Liu and Y. Zhang, *Electrochim. Acta*, 2019, **318**, 892-900.
- S11 C. Wang, H. Shang, Y. Wang, H. Xu, J. Li and Y. Du, *J. Mater. Chem. A*, 2021, **9**, 14601-14606.



- S12 L. Li, Y. Guo, X. Wang, X. Liu and Y. Lu, *Langmuir*, 2021, **37**, 5986-5992.
- S13 A. Muthurasu, G. P. Ojha, M. Lee and H. Y. Kim, *Electrochim. Acta*, 2020, **334**, 135537.
- S14 R. S. Kumar, S. C. Karthikeyan, S. Ramakrishnan, S. Vijayapradeep, A. R. Kim, J. S. Kim and D. J. Yo, *Chem. Eng. J.*, 2023, **451**, 138471.
- S15 J. Sun, S. Li, Q. Zhang and J. Guan, *Sustainable Energy Fuels*, 2020, **4**, 4531-4537.
- S16 P. Zhang, X. F. Lu, J. Nai, S. Q. Zang and X. W. Lou, *Adv. Sci.*, 2019, **6**, 1900576.
- S17 F. Guo, Z. Liu, J. Xiao, X. Zeng, C. Zhang, Y. Lin, P. Dong, T. Liu, Y. Zhang and M. Li, *Chem. Eng. J.*, 2022, **446**, 137111.
- S18 S. Yuan, M. Xia, Z. Liu, K. Wang, L. Xiang, G. Huang, J. Zhang and N. Li, *Chem. Eng. J.*, 2022, **430**, 132697.
- S19 W. Xu, S. Zhao, J. P. Zhang, X. Yang, Y. X. Tang, Y. W. Han and Y. Shen, *Int. J. Hydrog. Energy*, 2023, **48**, 18315-18325.
- S20 R. Zhu, X. Yu, W. Li, M. Li, X. Bo and G. Gan, *J. Alloys Compd.*, 2023, **947**, 169488.
- S21 C. F. Li, J. W. Zhao, L. J. Xie, J. Q. Wu and G. R. Li, *Appl. Catal. B: Environ.*, 2021, **291**, 119987.
- S22 X. P. Li, L.R.Zheng, S. J. Liu, T. Ouyang, S. Ye and Z. Q. Liu, *Chin. Chem. Lett.*, 2022, **33**, 4761-4765.
- S23 X. Xu, L. Su, Y. Zhang, L. Dong and X. Miao, *New J. Chem.*, 2021, **45**, 15429-15436.
